# Supplementary material for: Testosterone nadir and clinical outcomes in patients with advanced prostate cancer: Post hoc analysis of triptorelin pamoate Phase III studies
Source: PubMed Central journal article supplement (PMC10927911; doi:10.1002/bco2.318), 2024-01-10
Supplement: BCO2-5-392-s001.pdf [file BCO2-5-392-s001.pdf]

## BJU INTERNATIONAL AUTHOR PRE-SUBMISSION CHECKLIST

Please complete this checklist and upload together with your manuscript submission at <https://mc.manuscriptcentral.com/bjui>

**Please note that manuscripts submitted with an incomplete or incorrectly completed form will be returned to the authors without review**

| GUIDELINES                                                                                                                                                                                                                         | Yes                      | No/Not Applicable        |
|------------------------------------------------------------------------------------------------------------------------------------------------------------------------------------------------------------------------------------|--------------------------|--------------------------|
| <b>BJU International Author Guidelines.</b> We have read and adhere to the <a href="#">Author Guidelines</a>                                                                                                                       | <input type="checkbox"/> | <input type="checkbox"/> |
| <b>BJU International How to write a Manuscript.</b> We have read <a href="#">BJUI's Advice on preparing a scientific manuscript</a>                                                                                                | <input type="checkbox"/> | <input type="checkbox"/> |
| <b>Plagiarism check.</b> We accept that our manuscript may be screened for plagiarism against previously published work                                                                                                            | <input type="checkbox"/> | <input type="checkbox"/> |
| <b>Declaration of Interests.</b> We include a full statement of declaration of interests for all authors                                                                                                                           | <input type="checkbox"/> | <input type="checkbox"/> |
| <b>Ethics.</b> We adhere to Best Practice Guidelines on Publication Ethics                                                                                                                                                         | <input type="checkbox"/> | <input type="checkbox"/> |
| <b>References.</b> References conform to the Vancouver style                                                                                                                                                                       | <input type="checkbox"/> | <input type="checkbox"/> |
| <b>Funding</b> (if applicable). We include information regarding research funding                                                                                                                                                  | <input type="checkbox"/> | <input type="checkbox"/> |
| <b>Reporting of complications</b> (if applicable). We have used the Clavien-Dindo classification of surgical complications and follow the EAU guideline recommendations (please see <a href="#">Author Guidelines</a> for details) | <input type="checkbox"/> | <input type="checkbox"/> |

| REPORTING STATISTICS, TABLES AND FIGURES                                                                                                                                                                                                                                                                                                                                           | Yes                      | No/Not Applicable        |
|------------------------------------------------------------------------------------------------------------------------------------------------------------------------------------------------------------------------------------------------------------------------------------------------------------------------------------------------------------------------------------|--------------------------|--------------------------|
| <b>Reporting Statistics.</b> We have read and adhere to the <a href="#">BJU International Guidelines for Reporting Statistics</a>                                                                                                                                                                                                                                                  | <input type="checkbox"/> | <input type="checkbox"/> |
| We adhere to <b>Rule 2.1.</b> We follow existing <b>Reporting Guidelines</b> for the type of study we are reporting (e.g., CONSORT for RCTs, PRISMA and AMSTAR for Systematic Reviews, STROBE for observational studies, ReMARK for marker studies). Reporting guidelines and templates for checklists and flow charts can be downloaded from the <a href="#">Equator Web site</a> | <input type="checkbox"/> | <input type="checkbox"/> |
| <b>Reporting Figures and Tables.</b> We have read and adhere to the <a href="#">BJU International Guidelines for Reporting of Figures and Tables</a>                                                                                                                                                                                                                               | <input type="checkbox"/> | <input type="checkbox"/> |

| COVER LETTER                                                                                                                                                                                                                                                      | Yes | No/Not Applicable |
|-------------------------------------------------------------------------------------------------------------------------------------------------------------------------------------------------------------------------------------------------------------------|-----|-------------------|
| We include a cover letter                                                                                                                                                                                                                                         |     |                   |
| The cover letter summarizes the key message of the manuscript                                                                                                                                                                                                     |     |                   |
| The cover letter confirms that the paper has not been submitted elsewhere                                                                                                                                                                                         |     |                   |
| The cover letter includes any additional pertinent information                                                                                                                                                                                                    |     |                   |
| <b>Patient consent form for videos</b> (if applicable). The corresponding author confirms in the covering letter that a signed release form has been received from each patient videoed authorizing the offline and/or online distribution of this video material |     |                   |

| BJU International has 9 different Article Types. Please choose the one that applies to your submission: | Yes |
|---------------------------------------------------------------------------------------------------------|-----|
| (1) Original Article                                                                                    |     |
| (2) Review Article                                                                                      |     |
| (3) Comment Article                                                                                     |     |
| (4) Research Communication                                                                              |     |
| (5) Step-by-Step Article                                                                                |     |
| (6) Case of the Month (by invitation only)                                                              |     |
| (7) Editorial (only commissioned by the Editor)                                                         |     |
| (8) Trainees' Corner (contact the Editorial Office)                                                     |     |
| (9) Letter to the Editor                                                                                |     |

| Please fill out the information relevant to your Article Type:                                                                                           |  |
|----------------------------------------------------------------------------------------------------------------------------------------------------------|--|
| <b>(1) Original Article</b>                                                                                                                              |  |
| <b>Word count:</b> max 4000 words:                                                                                                                       |  |
| <b>Abstract format:</b> <i>Objectives; Subjects/patients (or materials) and methods; Results; Conclusion</i>                                             |  |
| <b>Key words:</b> 5–10 key words                                                                                                                         |  |
| <b>Manuscript text subheadings:</b> <i>Introduction; Subjects/Patients (or Materials) and Methods; Results; Discussion; Acknowledgements; References</i> |  |
| <b>Legends to Figures</b>                                                                                                                                |  |
| <b>Figures:</b> max 3                                                                                                                                    |  |
| <b>Tables:</b> max 3                                                                                                                                     |  |
| <b>References:</b> max 30                                                                                                                                |  |
| <b>(2) Narrative Review/Systematic Review</b>                                                                                                            |  |
| <b>Word count:</b> max 4000/5000 words:                                                                                                                  |  |
| <b>Figures or Tables:</b> max 6 total                                                                                                                    |  |
| <b>References:</b> 50/no max                                                                                                                             |  |
| <b>Systematic Reviews:</b> The study was pre-registered in PROSPERO                                                                                      |  |
| <b>(3) Comment Article</b>                                                                                                                               |  |
| <b>Word count:</b> max 1000 words:                                                                                                                       |  |
| <b>Figure or Table:</b> max 1                                                                                                                            |  |
| <b>References:</b> max 6                                                                                                                                 |  |
| <b>(4) Research Communication</b>                                                                                                                        |  |
| <b>Subheadings.</b> The manuscript has NO subheadings                                                                                                    |  |
| <b>Word count:</b> max 1200 words:                                                                                                                       |  |
| <b>Figure or Table:</b> max 1                                                                                                                            |  |
| <b>References:</b> max 8                                                                                                                                 |  |
| <b>(5) Step-by-Step Article</b>                                                                                                                          |  |
| <b>Word count:</b> max 1200 words:                                                                                                                       |  |
| <b>Figure or Table:</b> max 3 for key stages of the procedure                                                                                            |  |
| <b>References:</b> max 8                                                                                                                                 |  |
| <b>Video:</b> max 8 minutes                                                                                                                              |  |
| <b>(6) Case of the Month</b>                                                                                                                             |  |
| We have been invited by a BJUI Editor to write this article                                                                                              |  |
| <b>(7) Editorial</b>                                                                                                                                     |  |
| We have been invited by a BJUI Editor to write this article                                                                                              |  |
| <b>Abstract.</b> The manuscript has NO abstract                                                                                                          |  |
| <b>Word count:</b> 500–800 words:                                                                                                                        |  |
| <b>Figure or Table:</b> max 1 total                                                                                                                      |  |
| <b>References:</b> max 6                                                                                                                                 |  |
| <b>(8) Trainees' Corner</b>                                                                                                                              |  |
| We have contacted the Editorial Office about this article                                                                                                |  |
| <b>Trainee.</b> The first or last author is a trainee                                                                                                    |  |
| <b>(9) Letter to the Editor</b>                                                                                                                          |  |
| <b>Word count:</b> max 500 words                                                                                                                         |  |
| <b>References:</b> max 4                                                                                                                                 |  |
